<sup>1</sup>Comprehensive Heart Failure Center (CHFC), Department for Medicine I, University and University Hospital Würzburg, Würzburg, Germany  
<sup>2</sup>Comprehensive Heart Failure Center (CHFC), Würzburg, Germany

**onbehalf:** AHF Registry

Abstract Figure.

|                  | log NT-proBNP<br>[N=108] | LVEF [%]<br>[N=126] | E' wave<br>[N=118] |
|------------------|--------------------------|---------------------|--------------------|
| <b>GW1</b>       |                          |                     |                    |
| <b>Admission</b> | -0.375 ***               | 0.840***            | 0.370***           |
| <b>Discharge</b> | -0.355***                | 0.870***            | 0.370***           |
| <b>GCW</b>       |                          |                     |                    |
| <b>Admission</b> | -0.394***                | 0.830***            | 0.380***           |
| <b>Discharge</b> | -0.359***                | 0.864***            | 0.355***           |
| <b>GW2</b>       |                          |                     |                    |
| <b>Admission</b> | 0.064                    | -0.143              | -0.120             |
| <b>Discharge</b> | 0.062                    | -0.158              | -0.178             |
| <b>GWE [%]</b>   |                          |                     |                    |
| <b>Admission</b> | -0.213*                  | 0.648***            | 0.329***           |
| <b>Discharge</b> | -0.229*                  | 0.627***            | 0.277***           |

Pearson product-moment correlation coefficient. \* $p < 0.05$ , \*\* $p < 0.01$  \*\*\* $p < 0.001$ .  
GWl: global work index, GCW: global constructive work [mmHg%], GWW: global wasted work [mmHg%], GWE: global work efficiency [%]. Correlations  $< 0.3$  are considered weak, and correlations  $> 0.6$  strong.
